# Supplementary figures and images for: Analysis of tear fluid protein fractions using surface-enhanced Raman spectroscopy (SERS), followed by a high-performance liquid chromatography-light emitting diode-induced fluorescence (HPLC-LED-IF) method
Source: Royal Society of Chemistry journal article supplement (doi:10.1039/d5ra05549k), 2025-01-01

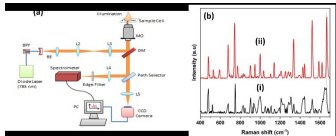

Supplement: d5ra05549k3.pdf [file d5ra05549k3.pdf]

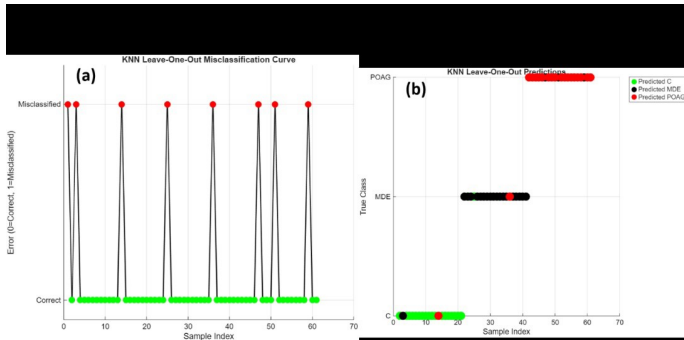

Supplement: d5ra05549k7.pdf [file d5ra05549k7.pdf]
